# Supplementary material for: A supramolecular fluorescence array sensor for toxic heavy metal ion detection in environmental water and rice seedling extracts
Source: Royal Society of Chemistry journal article supplement (doi:10.1039/d3dt00995e), 2023-01-01
Supplement: d3dt00995e1.pdf [file d3dt00995e1.pdf]

## Supporting Information

### Supramolecular fluorescence array sensor for toxic heavy metal ions detection in environmental water and rice seedling extracts

Ru-Pei Yang<sup>a</sup>, Shu-Zhen Huang<sup>a</sup>, Kai-Ni Wei<sup>a</sup>, Qing Tang<sup>c</sup>, Zhu Tao<sup>a</sup>, Ying Huang<sup>a,b,\*</sup> An-Ting Zhao<sup>a\*\*</sup>

<sup>a</sup> Key Laboratory of Macrocyclic and Supramolecular Chemistry of Guizhou Province, Guizhou University, Guiyang 550025, China.

<sup>b</sup> The Engineering and Research Center for Southwest Bio-Pharmaceutical Resources of National Education Ministry of China, Guizhou University, Guiyang 550025, China

<sup>c</sup> Department College of Tobacco Science, Guizhou University, Guiyang 550025, China

Corresponding e-mail: [yinghung128@163.com](mailto:yinghung128@163.com)

#### Contents

|                                                                                                                                                                                                                     |    |
|---------------------------------------------------------------------------------------------------------------------------------------------------------------------------------------------------------------------|----|
| <b>Fig S1.</b> The mode of action of 6-QAA and Q7.....                                                                                                                                                              | 3  |
| <b>Fig S2.</b> The mode of action of PyY and Q7.....                                                                                                                                                                | 4  |
| <b>Fig S3.</b> The mode of action of TO and Q8 .....                                                                                                                                                                | 5  |
| <b>Fig.S4</b> The Mass spectrum of 6-QAA@Q[7] .....                                                                                                                                                                 | 6  |
| <b>Fig.S5</b> The Mass spectrum of PyY@Q[7] .....                                                                                                                                                                   | 6  |
| <b>Fig.S6</b> The Mass spectrum of TO@Q[8].....                                                                                                                                                                     | 6  |
| <b>Fig S7.</b> Ternary titration of 6-QAA@Q[7] with metal ions .....                                                                                                                                                | 7  |
| <b>Fig S8.</b> Ternary titration of PyY@Q[7] with metal ions .....                                                                                                                                                  | 8  |
| <b>Fig S9.</b> Ternary titration of TO@Q[8] with metal ions .....                                                                                                                                                   | 9  |
| <b>Fig S10.</b> LDA Scoring Diagram and Linear Relationship Diagram of Array Sensor for Different Concentrations of Metal Ions (Ag <sup>+</sup> , Cr <sup>3+</sup> , Ni <sup>2+</sup> ,and Pb <sup>2+</sup> ) ..... | 10 |
| <b>Fig S11.</b> Typical score plot of LDA response pattern of quaternary mixtur .....                                                                                                                               | 11 |
| <b>Fig. S12.</b> (A) PCA showed the main contribution of array sensors (P1, P2, P3) to lake water samples (P1, P2, P3). (B) PCA shows the main contribution of sensors (P1 and P2).....                             | 11 |
| <b>Fig. S13.</b> rice before treatment and early stage of rice seed germination.....                                                                                                                                | 12 |
| <b>Fig S14.</b> (a) Hg standard curve data, (b) Hg standard curve graph.....                                                                                                                                        | 12 |
| <b>Table S1.</b> Array sensor for five different metal ions to produce fluorescence response mode training matrix classification (500μM metal, 10μM ultrapure water sensor) .....                                   | 13 |
| <b>Table S2.</b> Sensor array for different Hg <sup>2+</sup> concentration of fluorescence response mode training matrix classification .....                                                                       | 13 |

Fig S15 Job's plot obtained by continuous variation of the mole fraction of 6-QAA@Q[7] and  $\text{Hg}^{2+}$  .....14

Fig S16 Isothermal titration calorimetry of 6-QAA and  $\text{Hg}^{2+}$  with Q[7] and related thermodynamic parameters. ....15

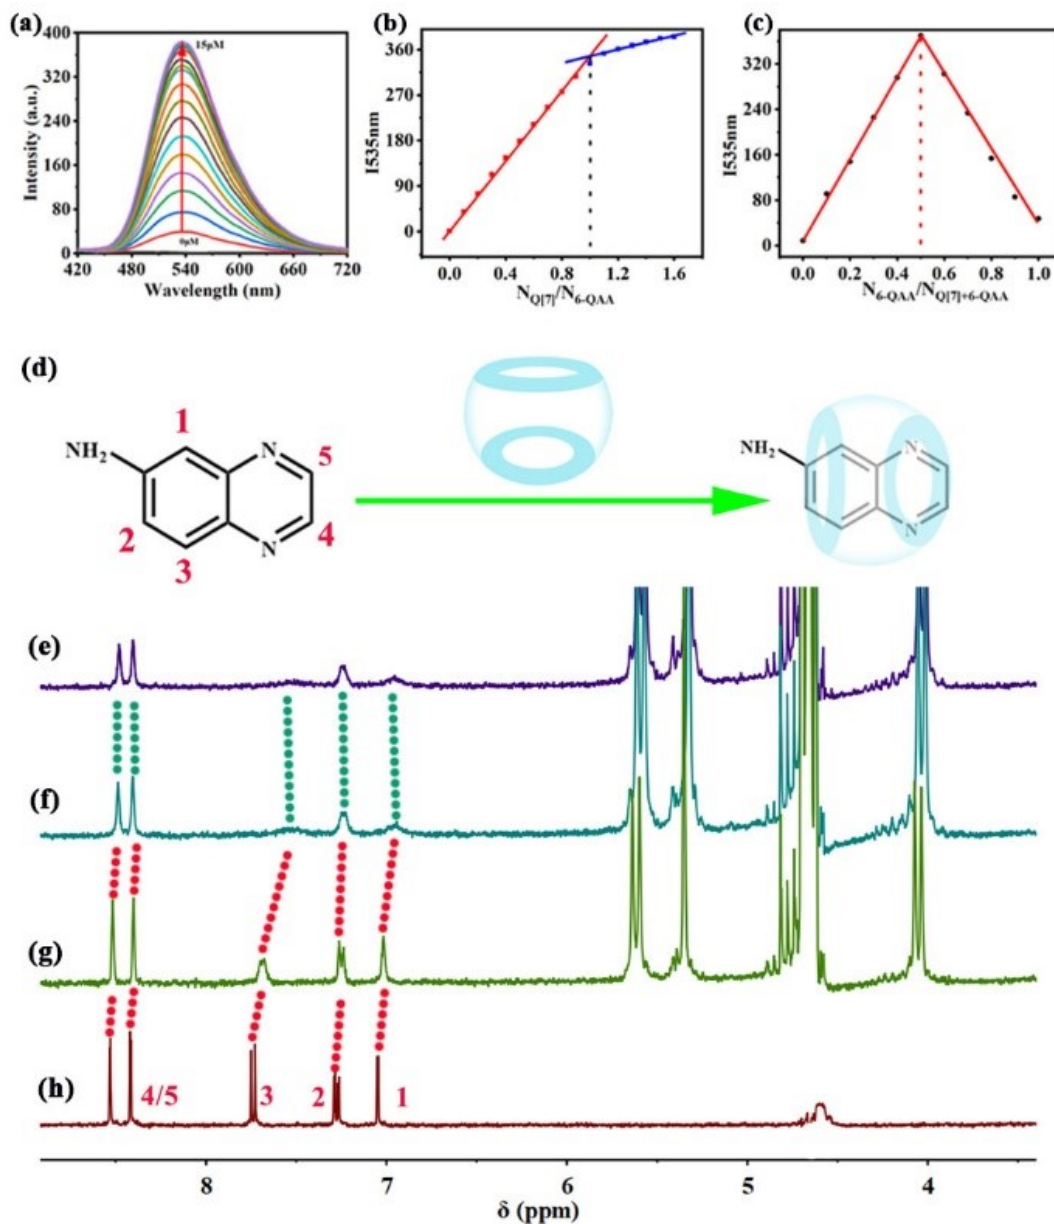

Fig.S1 (a) Changes of fluorescence spectra of 10 $\mu$ M 6-QAA solution with the increase of Q[7] solution, (b) Scatter diagram of fluorescence action of 10 $\mu$ M 6-QAA solution with the increase of Q [7] solution, (c) Job diagram of  $N_{6\text{-QAA}} / N_{Q[7] + 6\text{-QAA}}$ , (d) the possible interaction modes and  $^1\text{H}$  NMR titration spectra of 6-QAA recorded upon the addition of Q[7], respectively (e) 6-QAA / Q[7](1:1.5), (f) 6-QAA / Q[7] (1:1), (g) 6-QAA / Q[7] (1:0.5), (h) 6-QAA.

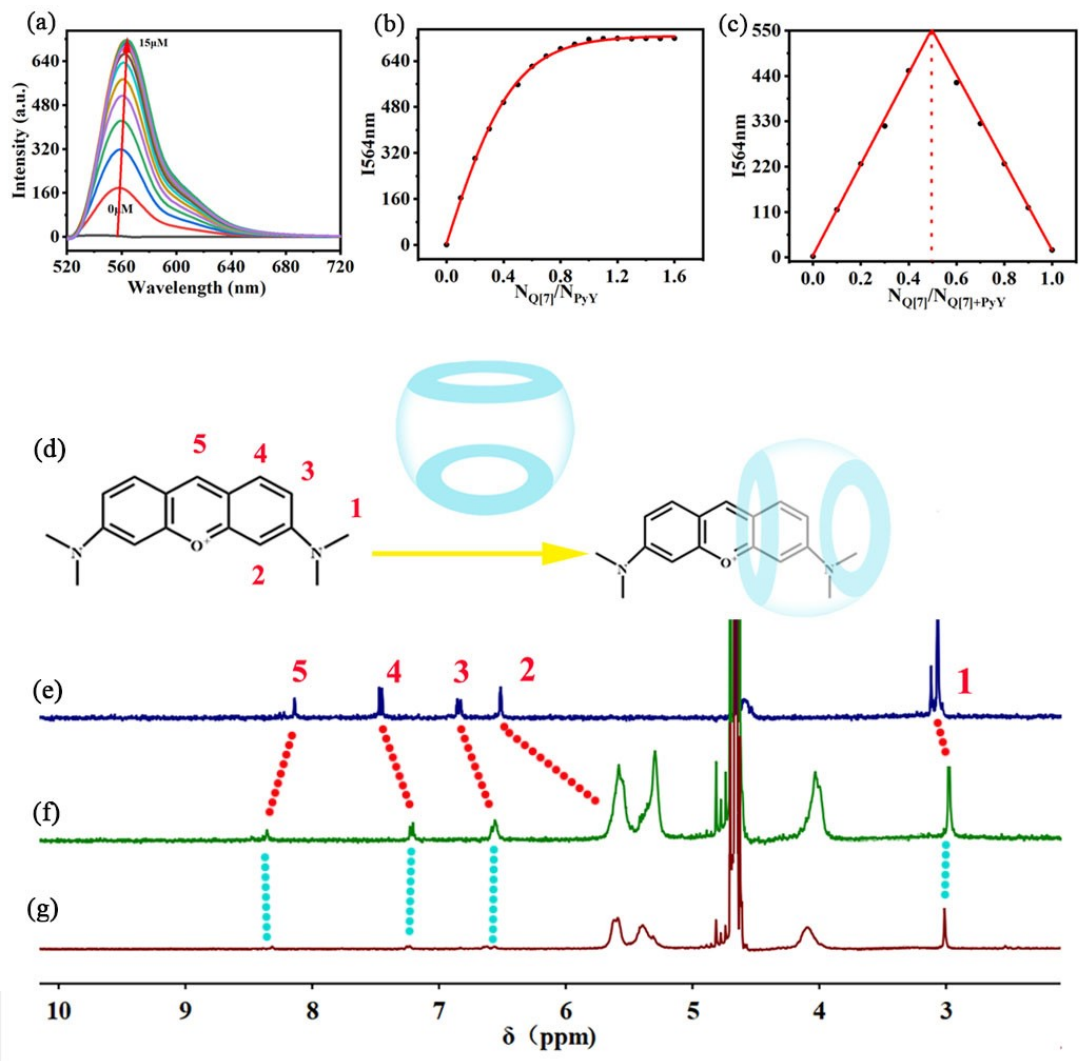

Fig.S2 (a) The fluorescence spectra of 10 $\mu$ M PyY solution changed with the increase of Q[7] solution, (b) The fluorescence interaction scatter diagram of 10 $\mu$ M PyY solution increased with the increase of Q[7] solution, (c) The Job diagram of  $N_{PyY} / N_{Q[7] + PyY}$ , (d) the possible interaction modes and  $^1\text{H}$  NMR titration spectra of PyY recorded upon the addition of Q[7], (c) respectively (e) PyY , (f) PyY / Q[7](1:0.5), (g) PyY / Q[7](1:1).

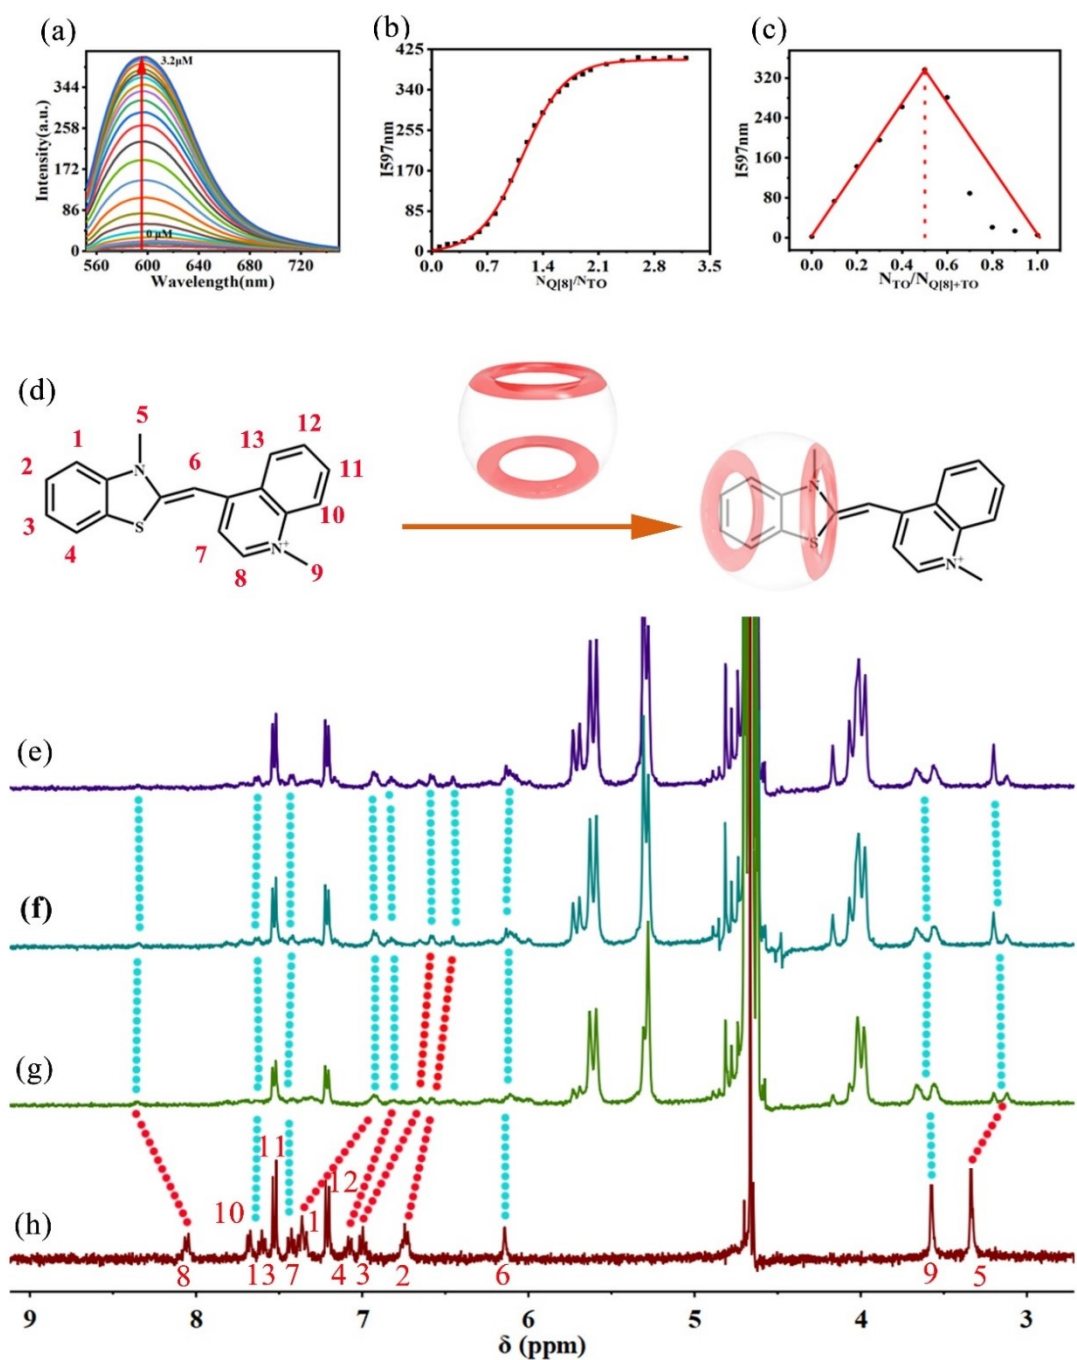

Fig.S3 (a) The change of fluorescence spectra of 10μMTO solution with the increase of Q[8] solution, (b) The fluorescence interaction scatter diagram of 10μMTO solution with the increase of Q[8] solution, (c) The Job diagram of  $N_{TO} / N_{Q[8]+TO}$ , (d) the possible interaction modes and <sup>1</sup>H NMR titration spectra of TO recorded upon the addition of Q[8](c), respectively (e) TO / Q[8](1:1.5), (f) TO / Q[8](1:1), (g) TO / Q[8](1:0.5), (h) TO.

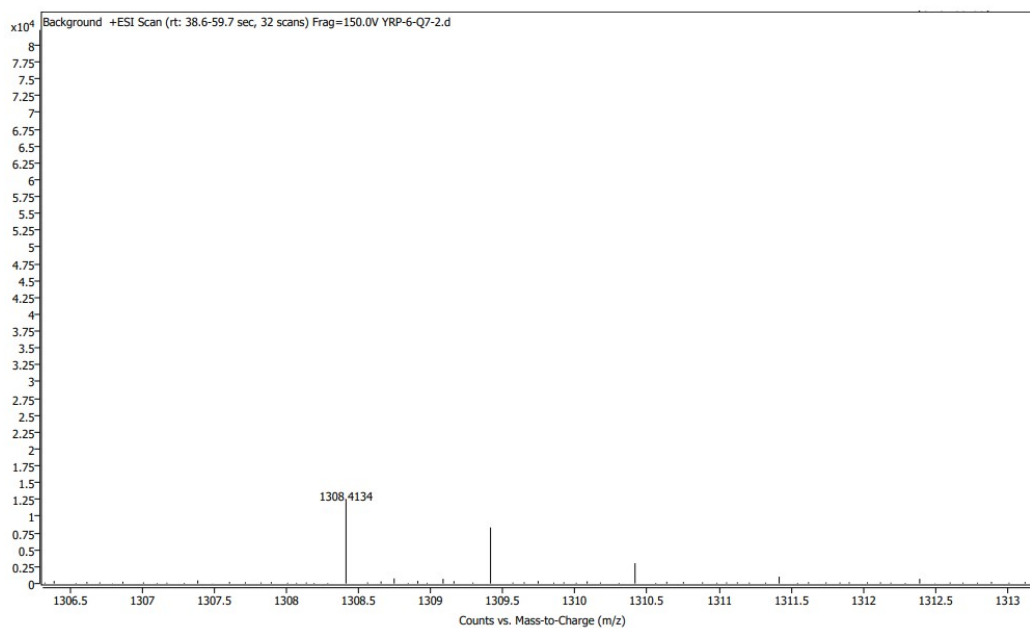

Fig.S4 The Mass spectrum of 6-QAA@Q[7],  $[M+H^+]=1308.41$ .

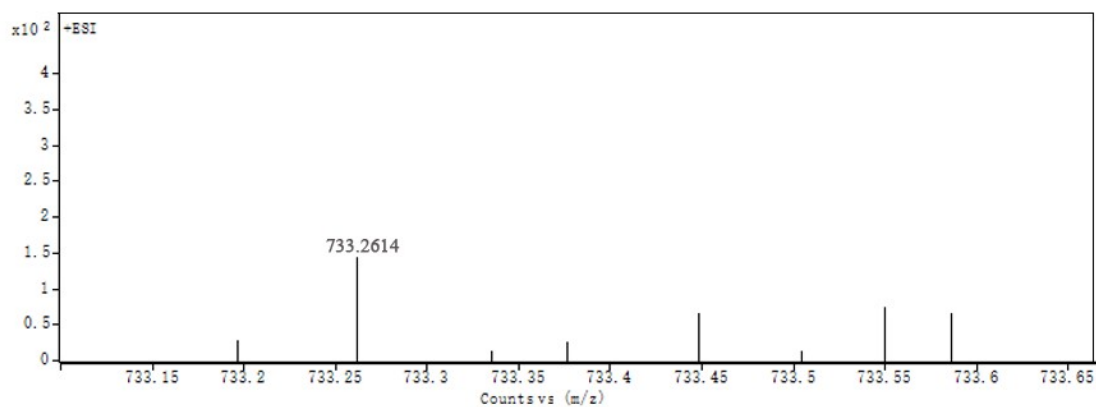

Fig.S5 The Mass spectrum of PyY@Q[7],  $[M+2H^+]=733.26$

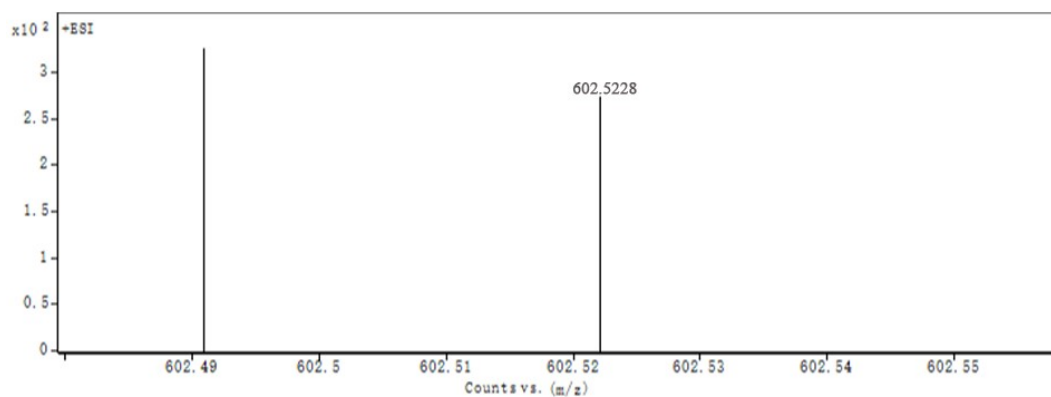

Fig.S6 The Mass spectrum of TO@Q[7],  $[M+3H^+]=602.52$

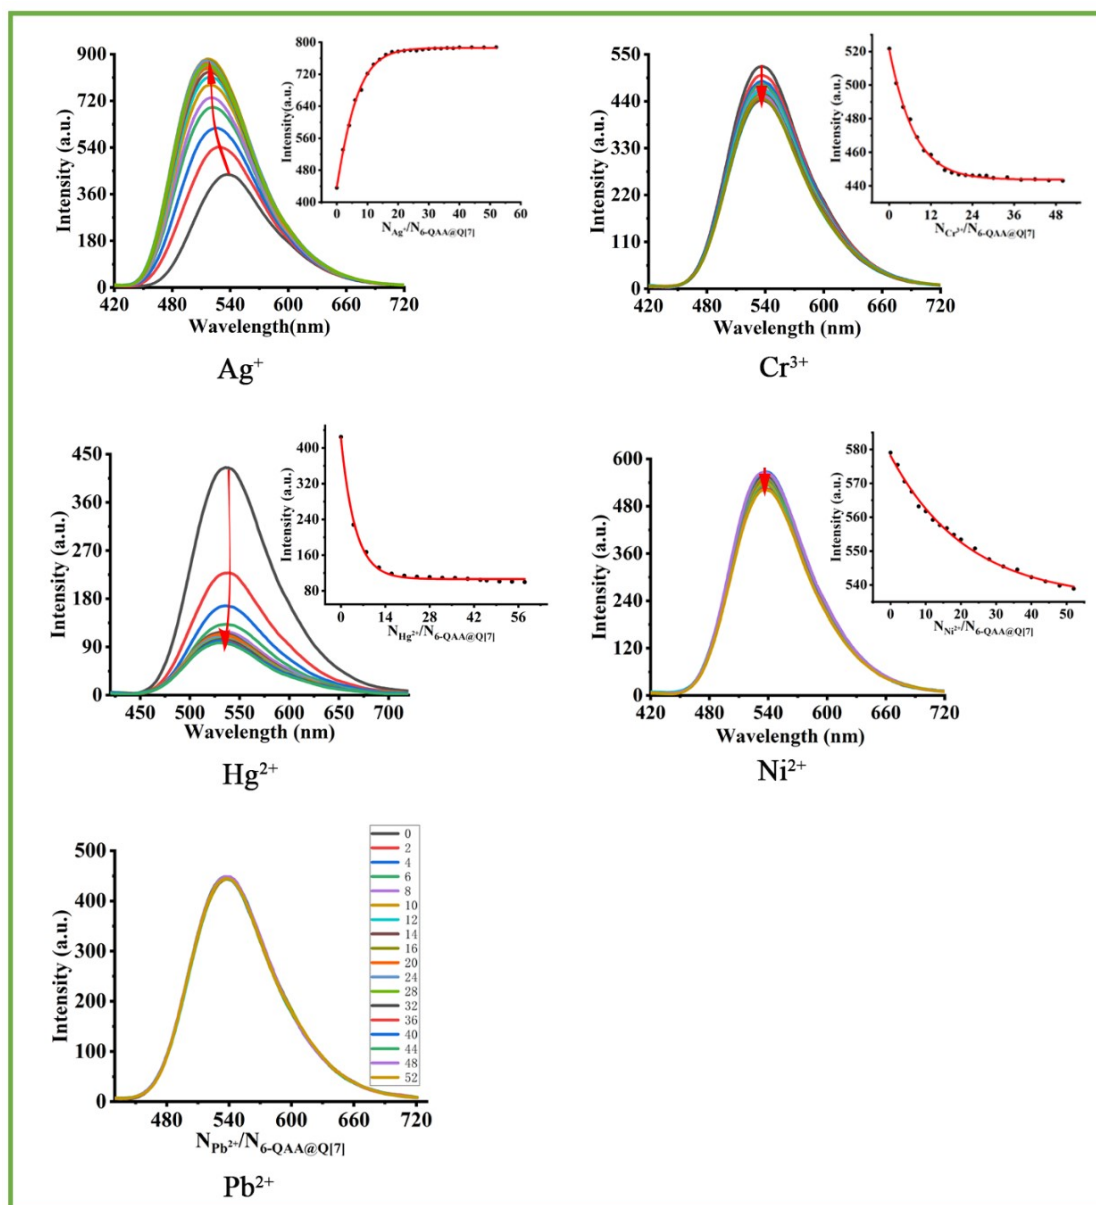

Fig.S7 The fluorescence intensity of 6-QAA@Q[7] and  $NM^{n+} / N_{6-QAA@Q[7]}$  change with increasing concentrations of different metal ions ( $Ag^+$ ,  $Cr^{3+}$ ,  $Hg^{2+}$ ,  $Ni^{2+}$ ,  $Pb^{2+}$ )

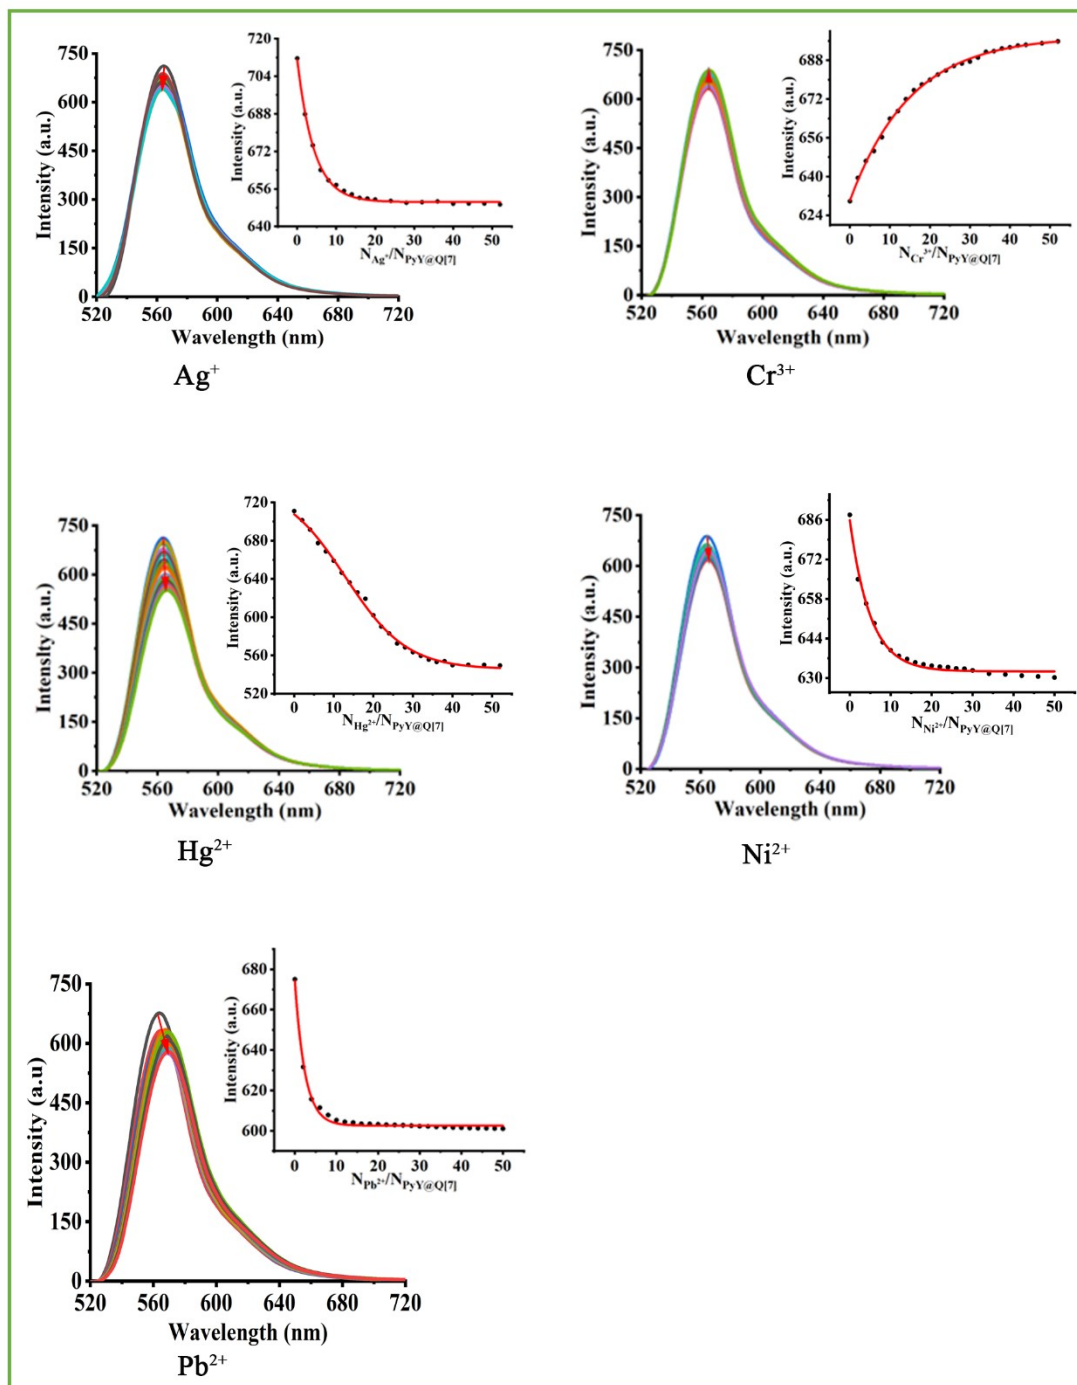

Fig.S8. Changes in fluorescence intensity of PyY@Q[7] and  $N_{M^{n+}} / N_{PyY@Q[7]}$  with increasing concentrations of different metal ions ( $Ag^+$ ,  $Cr^{3+}$ ,  $Hg^{2+}$ ,  $Ni^{2+}$ ,  $Pb^{2+}$ )



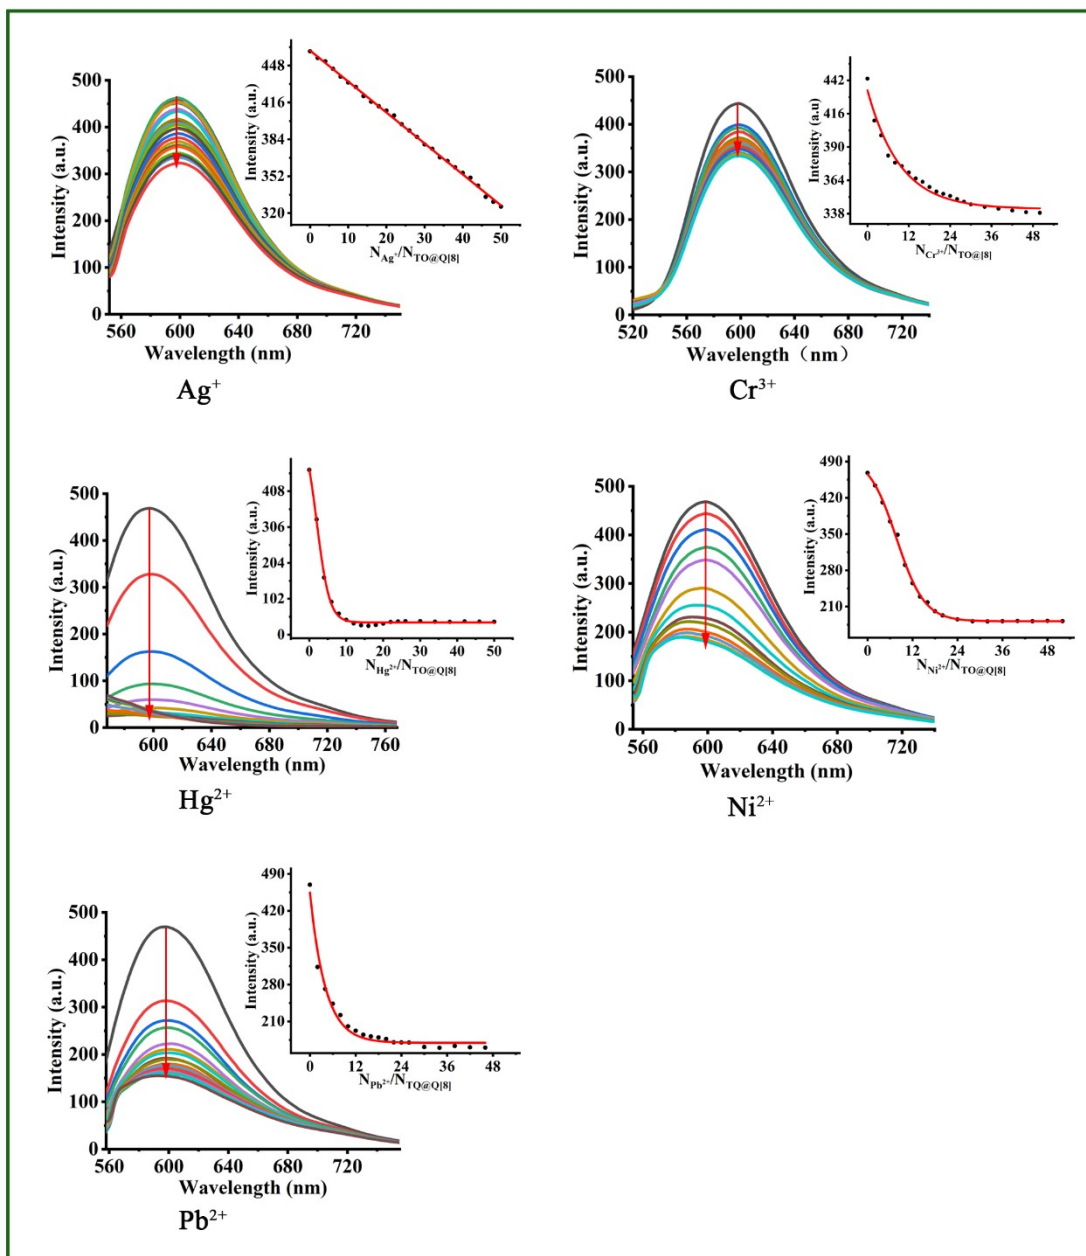

Fig.S9 Changes in the fluorescence intensity of TO@Q[8] and  $N_{M^{n+}} / N_{TO@Q[8]}$  with increasing concentrations of different metal ions ( $Ag^+$ ,  $Cr^{3+}$ ,  $Hg^{2+}$ ,  $Ni^{2+}$ ,  $Pb^{2+}$ ).



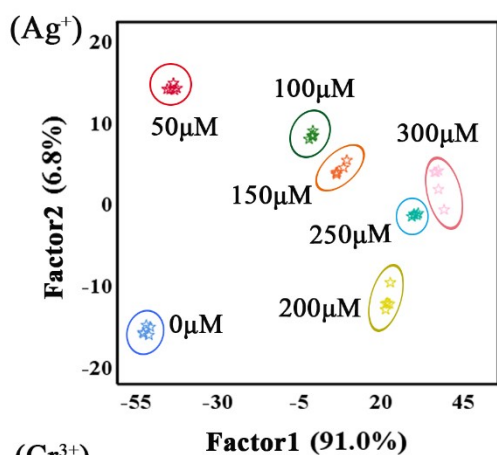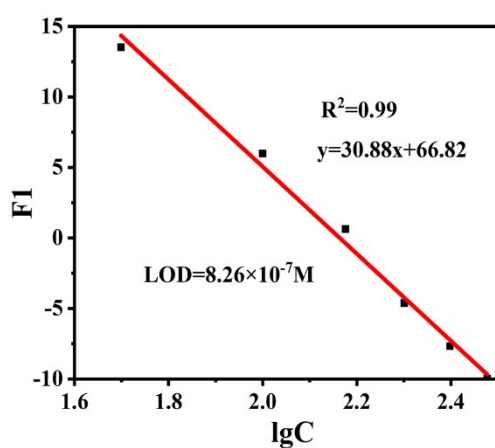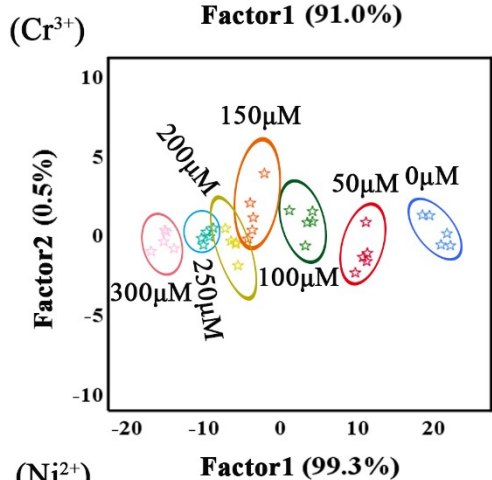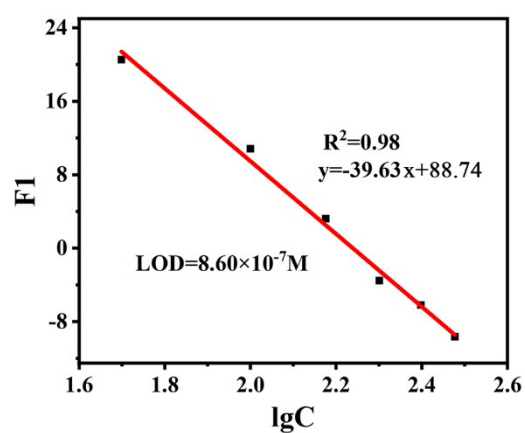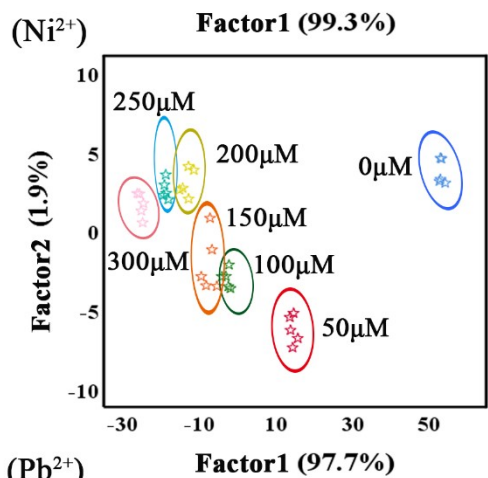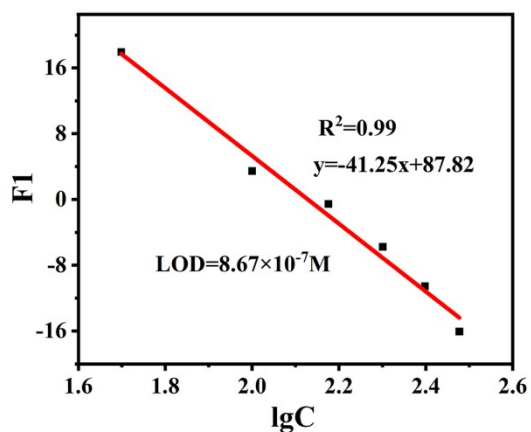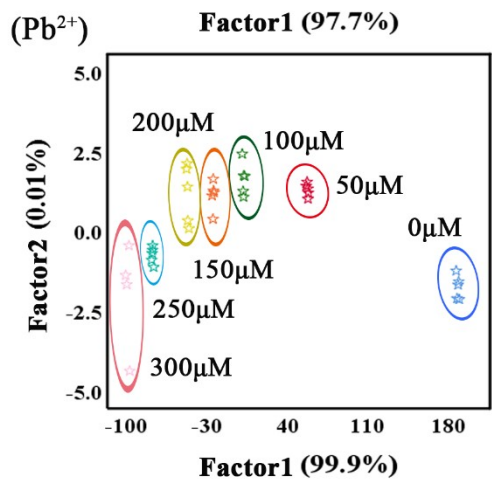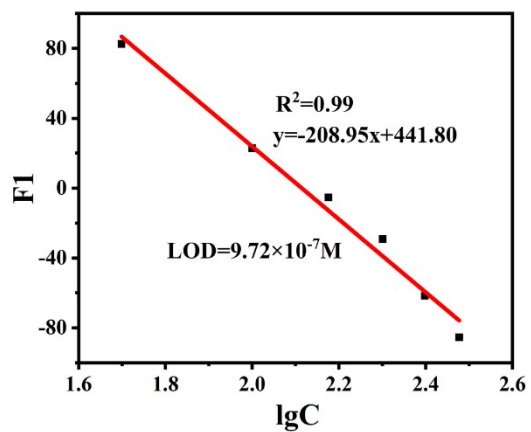

Figure. S10. the LDA score and linear relationship diagram of the array sensor for different concentrations of  $\text{Ag}^+$ ,  $\text{Cr}^{3+}$ ,  $\text{Ni}^{2+}$ ,  $\text{Pb}^{2+}$ .

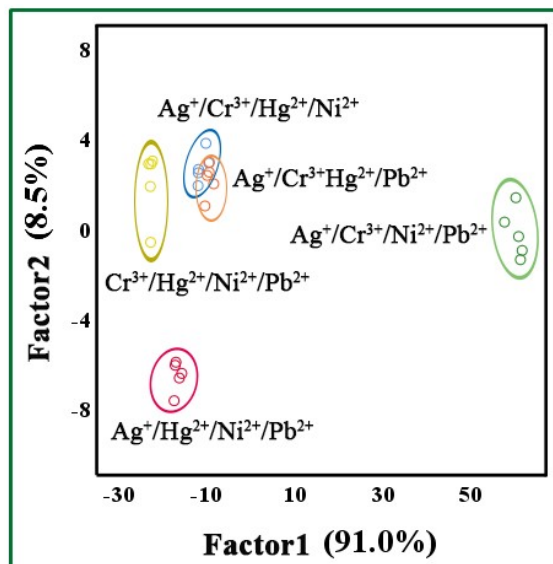

Figure. S11. Typical score plot of LDA response pattern of quaternary mixture

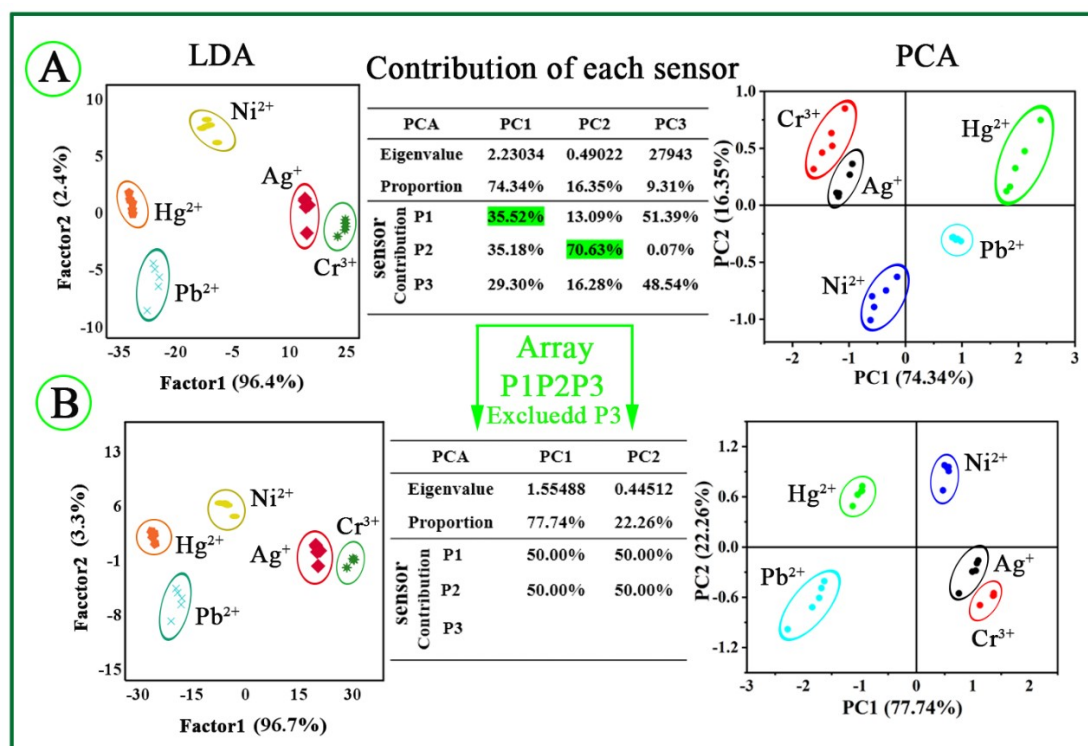

Fig. S12. (A) PCA showed the main contribution of array sensors (P1, P2, P3) to lake water samples (P1, P2, P3). (B) PCA shows the main contribution of sensors (P1 and P2).

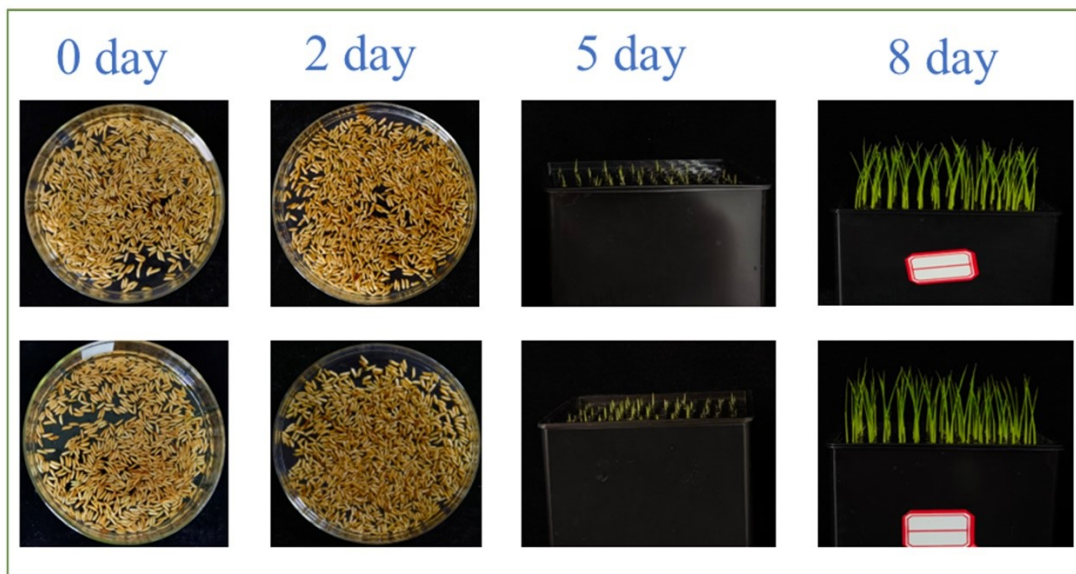

Fig. S13. Rice seeds before treatment and nutrient solution culture process.

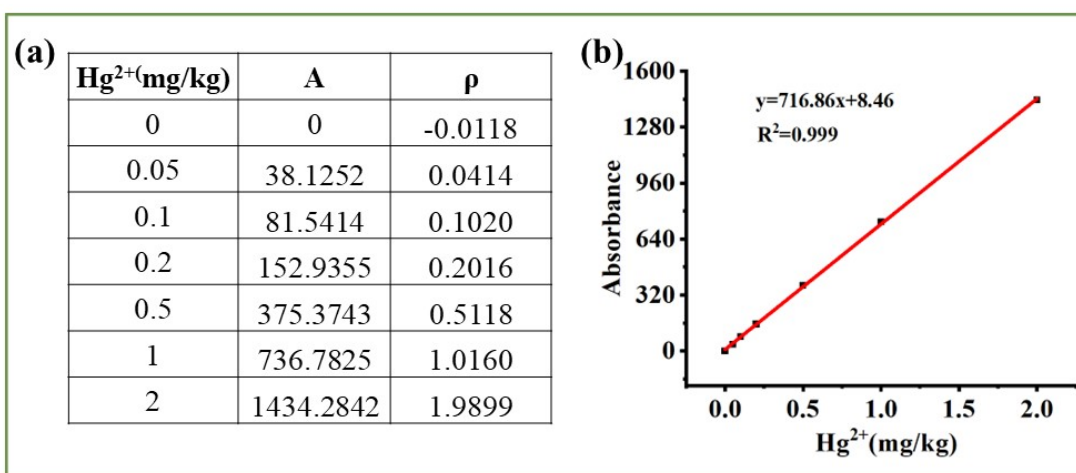

Figure. S14. ( a ) Hg standard curve data, ( b ) Hg standard curve graph. The 0.1000 g rice sample was ground and diluted to 100 ml, and 5 mL was diluted to 500 mL for detection. The measured A = 1282.67 was within the standard curve range of Hg, indicating that Hg<sup>2+</sup> was absorbed in the extract.

matrix classification (500 $\mu$ M metal, 10 $\mu$ M ultrapure water sensor).

| Metal           |       | Predictive classification |                  |                  |                  |                  |       |   |
|-----------------|-------|---------------------------|------------------|------------------|------------------|------------------|-------|---|
|                 |       | Ag <sup>+</sup>           | Cr <sup>3+</sup> | Hg <sup>2+</sup> | Ni <sup>2+</sup> | Pb <sup>2+</sup> | total |   |
| Original        | count | Ag <sup>+</sup>           | 5                | 0                | 0                | 0                | 0     | 5 |
|                 |       | Cr <sup>3+</sup>          | 0                | 5                | 0                | 0                | 0     | 5 |
|                 |       | Hg <sup>2+</sup>          | 0                | 0                | 5                | 0                | 0     | 5 |
|                 |       | Ni <sup>2+</sup>          | 0                | 0                | 0                | 5                | 0     | 5 |
|                 |       | Pb <sup>2+</sup>          | 0                | 0                | 0                | 0                | 5     | 5 |
| Cross-validated | count | Ag <sup>+</sup>           | 5                | 0                | 0                | 0                | 0     | 5 |
|                 |       | Cr <sup>3+</sup>          | 0                | 5                | 0                | 0                | 0     | 5 |
|                 |       | Hg <sup>2+</sup>          | 0                | 0                | 5                | 0                | 0     | 5 |
|                 |       | Ni <sup>2+</sup>          | 0                | 0                | 0                | 5                | 0     | 5 |
|                 |       | Pb <sup>2+</sup>          | 0                | 0                | 0                | 0                | 5     | 5 |

Table S2 Sensor array for different Hg<sup>2+</sup> concentration of fluorescence response mode training matrix classification.

| Hg <sup>2+</sup> ( $\mu$ M) |       | Predictive classification |    |     |     |     |     |     |     |       |   |
|-----------------------------|-------|---------------------------|----|-----|-----|-----|-----|-----|-----|-------|---|
|                             |       | 0                         | 50 | 100 | 150 | 200 | 230 | 250 | 300 | total |   |
| Original                    | count | 0                         | 5  | 0   | 0   | 0   | 0   | 0   | 0   | 0     | 5 |
|                             |       | 50                        | 0  | 5   | 0   | 0   | 0   | 0   | 0   | 0     | 5 |
|                             |       | 100                       | 0  | 0   | 5   | 0   | 0   | 0   | 0   | 0     | 5 |
|                             |       | 150                       | 0  | 0   | 0   | 5   | 0   | 0   | 0   | 0     | 5 |
|                             |       | 200                       | 0  | 0   | 0   | 0   | 5   | 0   | 0   | 0     | 5 |
|                             |       | 230                       | 0  | 0   | 0   | 0   | 0   | 5   | 0   | 0     | 5 |
|                             |       | 250                       | 0  | 0   | 0   | 0   | 0   | 0   | 5   | 0     | 5 |

|                 |       |   |   |   |   |   |   |   |   |   |
|-----------------|-------|---|---|---|---|---|---|---|---|---|
|                 | 300   | 0 | 0 | 0 | 0 | 0 | 0 | 0 | 5 | 5 |
| Cross-validated | count | 0 | 5 | 0 | 0 | 0 | 0 | 0 | 0 | 5 |
|                 | 50    | 0 | 5 | 0 | 0 | 0 | 0 | 0 | 0 | 5 |
|                 | 100   | 0 | 0 | 5 | 0 | 0 | 0 | 0 | 0 | 5 |
|                 | 150   | 0 | 0 | 0 | 5 | 0 | 0 | 0 | 0 | 5 |
|                 | 200   | 0 | 0 | 0 | 0 | 5 | 0 | 0 | 0 | 5 |
|                 | 230   | 0 | 0 | 0 | 0 | 0 | 4 | 1 | 0 | 5 |
|                 | 250   | 0 | 0 | 0 | 0 | 0 | 0 | 5 | 0 | 5 |
|                 | 300   | 0 | 0 | 0 | 0 | 0 | 0 | 0 | 0 | 5 |

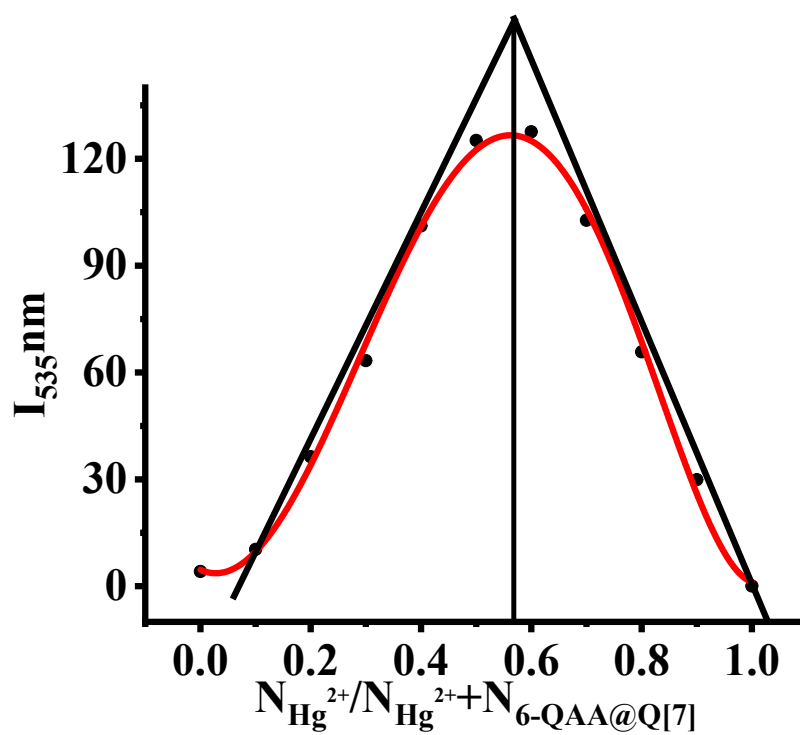

Fig S15 Job's plot obtained by continuous variation of the mole fraction of 6-QAA@Q[7] and  $\text{Hg}^{2+}$

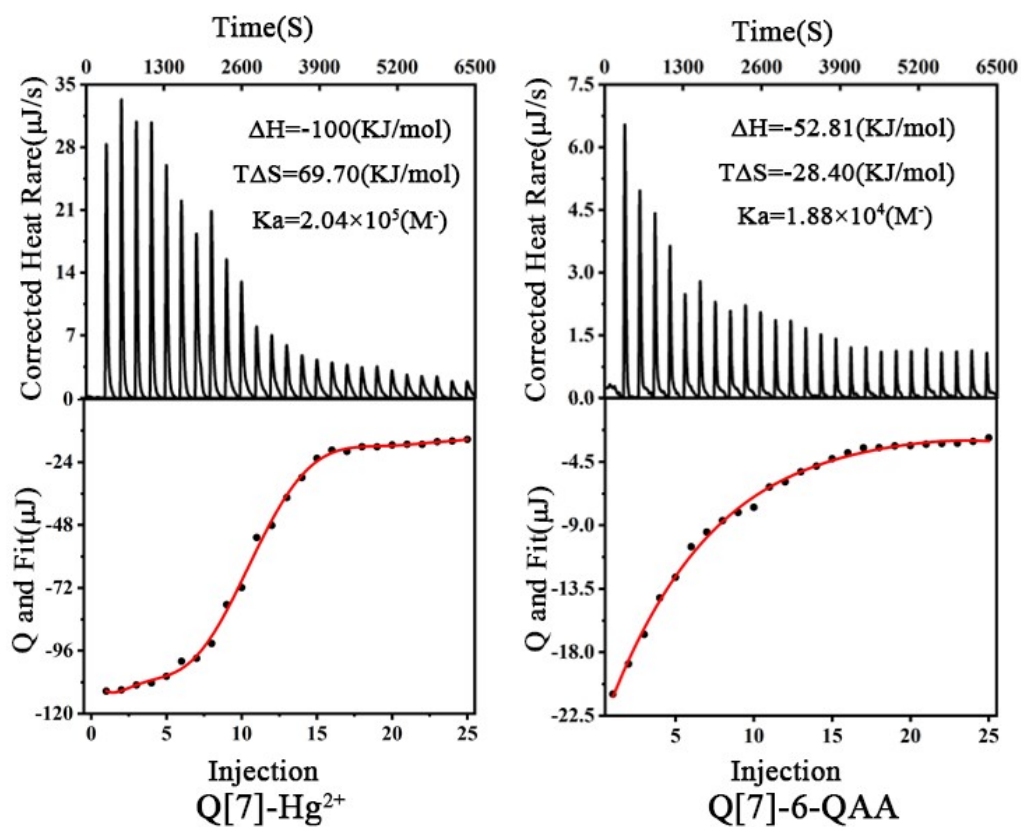

Fig S16 Isothermal titration calorimetry of 6-QAA and  $\text{Hg}^{2+}$  with Q[7] and related thermodynamic parameters.
